# Supplementary material
Source: HighWire-hosted journal article supplement (https://bmjopen.bmj.com/content/9/6/e026647)
Supplement: inline-supplementary-material-1 [file inline-supplementary-material-1.pdf]

**Supplementary Table S1.** The relationship between test requesting rates and demographic characteristics of patient population. Kendall's correlation coefficient tau:  $\tau$ . p-value associated with  $\tau$ :  $p_{Kendall}$ . Bonferroni-corrected significance cut-off:  $\alpha = p_{fwe}/n < 0.0125$  where  $p_{fwe} < 0.05$  is the family wise error probability and  $n = 4$  is the number of tested associations.

| Age group      | Electrolyte profiles | Lipid profiles | Thyroid profiles | Liver profiles |
|----------------|----------------------|----------------|------------------|----------------|
| ≥ 65 years old |                      |                |                  |                |
| $\tau$         | 0.21                 | 0.23           | 0.08             | 0.20           |
| $p_{Kendall}$  | 0.04                 | 0.02           | 0.4              | 0.05           |

**Supplementary Figure S1.** The relationship between the percentage of females in individual GP practices and requesting rates for thyroid profiles.

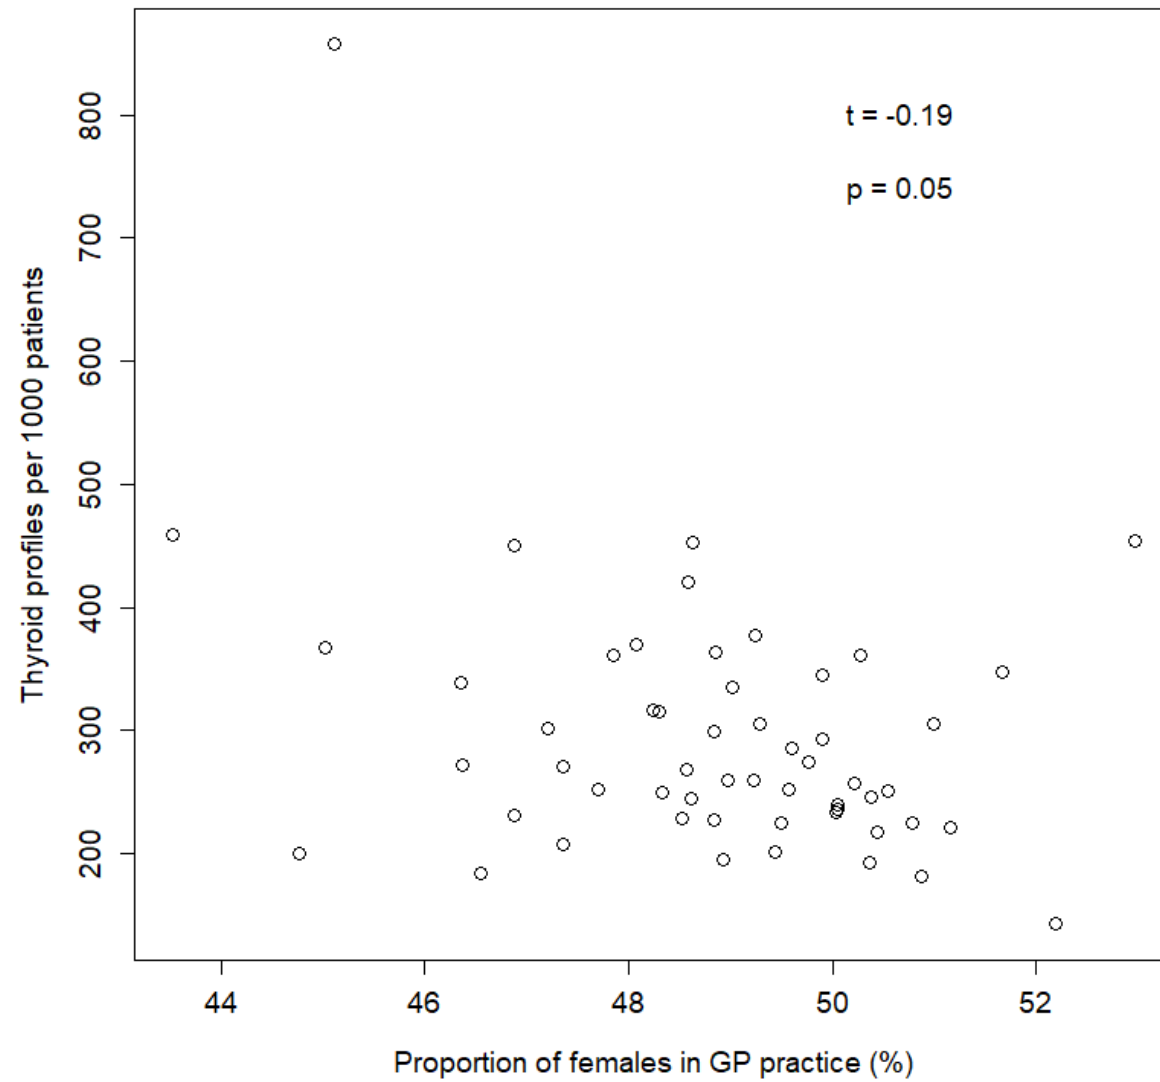

**Supplementary Figure S2.** The relationship between the percentage of males in individual GP practices and requesting rates for PSA.

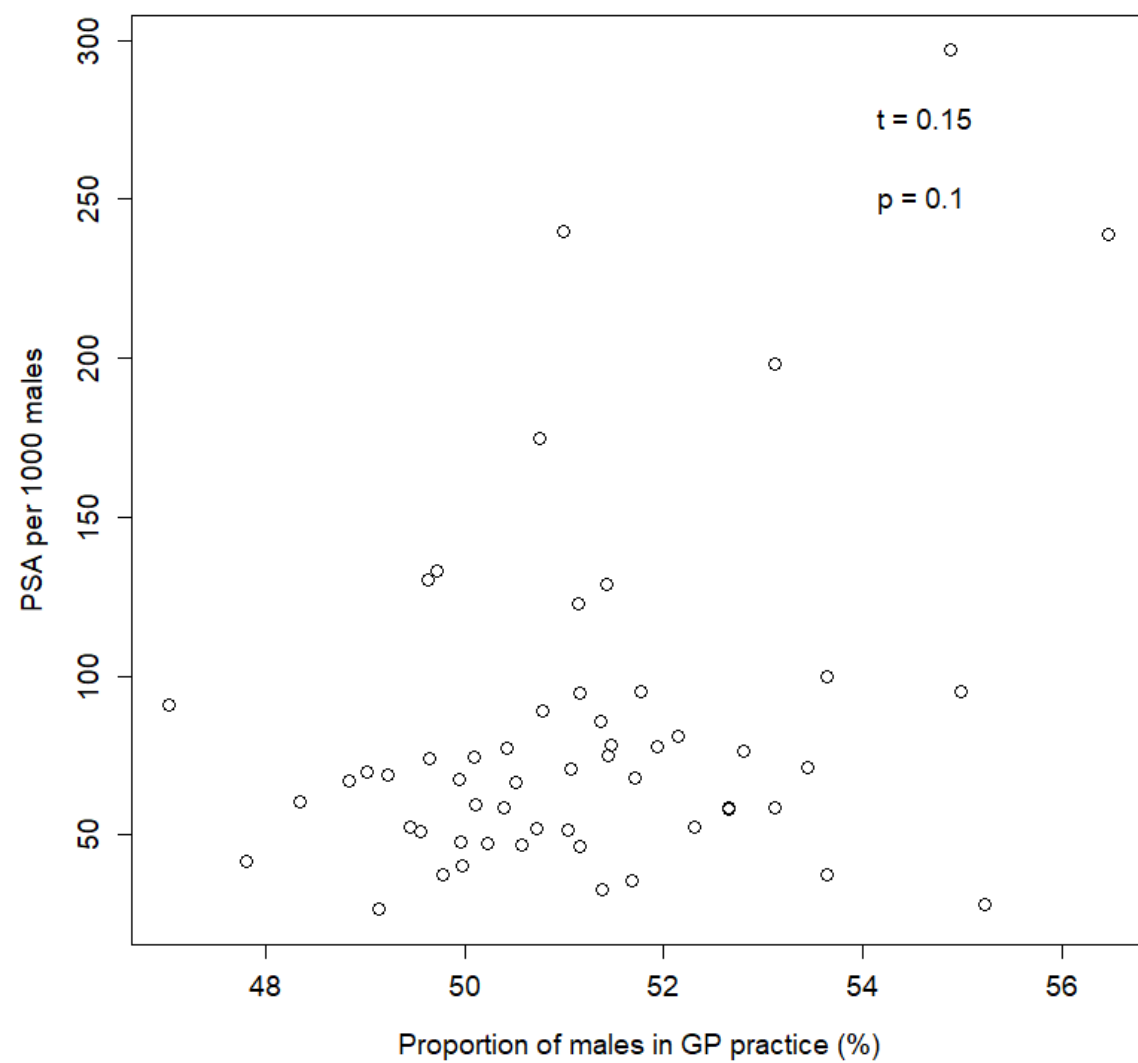

**Supplementary Table S2.** The relationship between test requesting rates and socioeconomic factors. Kendall's correlation coefficient tau:  $\tau$ ;  $p$ -value associated with  $\tau$ :  $p_{Kendall}$ . Bonferroni-corrected significance cut-off:  $\alpha = p_{fwe}/n < 0.003125$  where  $p_{fwe} < 0.05$  is the family wise error probability and  $n = 16$  is the number of tested associations.

|                                 | Electrolyte<br>profiles | Lipid<br>profiles | PSA   | Thyroid<br>profiles | HbA1c | Liver<br>profiles | ACR    | Immunoglobulins |
|---------------------------------|-------------------------|-------------------|-------|---------------------|-------|-------------------|--------|-----------------|
| Multiple Deprivation Measure    |                         |                   |       |                     |       |                   |        |                 |
| $\tau$                          | 0.034                   | 0.116             | 0.180 | 0.119               | 0.012 | 0.083             | -0.094 | -0.167          |
| $p_{Kendall}$                   | 0.7                     | 0.2               | 0.05  | 0.2                 | 0.9   | 0.4               | 0.3    | 0.08            |
| Health Deprivation & Disability |                         |                   |       |                     |       |                   |        |                 |
| $\tau$                          | 0.124                   | 0.256             | 0.209 | 0.239               | 0.062 | 0.185             | -0.021 | -0.156          |
| $p_{Kendall}$                   | 0.2                     | 0.007             | 0.013 | 0.01                | 0.5   | 0.05              | 0.8    | 0.1             |
